# Supplementary material
Source: publisher figshare collection journal article supplement (https://plos.figshare.com/articles/dataset/_/1364856)
Supplement: Supplementary file [file 1]

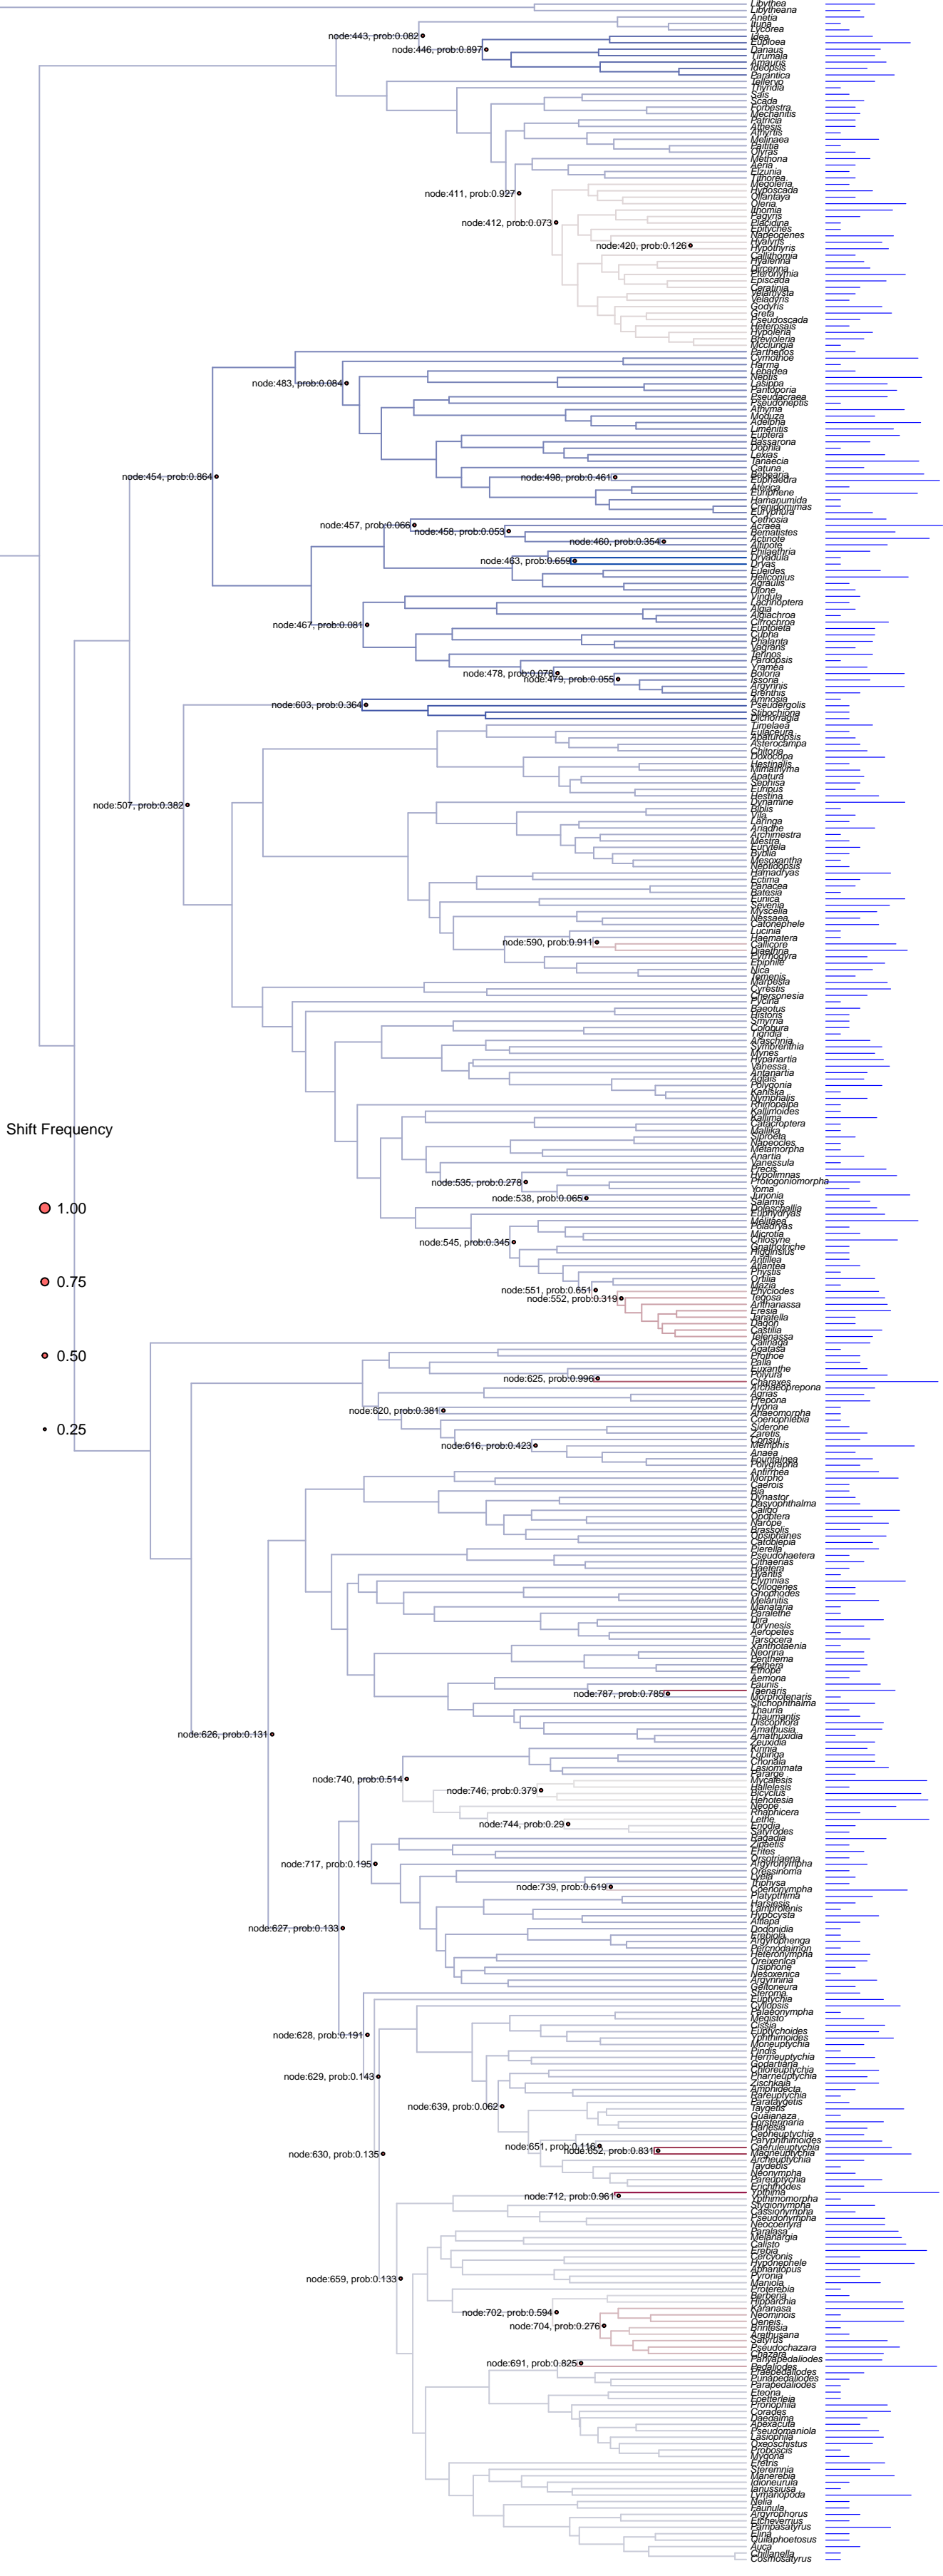

Shift Frequency

1.00

0.75

0.50

0.25

Divergence Time (MYA)

ln(species count + 1)
